# Supplementary material for: Prognostic and Clinicopathological Value of Cyclin E Expression in Breast Cancer: A Meta-Analysis
Source: Research Square preprint supplement (doi:10.21203/rs.3.rs-210720/v1), 2021-02-22

Additional file 4. Relationship between Cyclin E and clinicopathological features.

**1. Age**


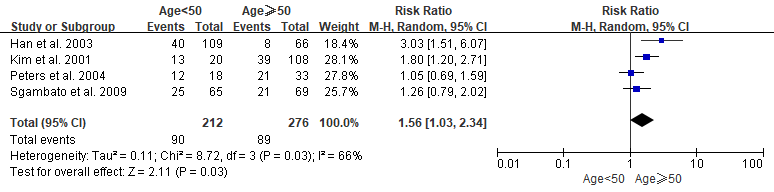


**2. Disease stage**


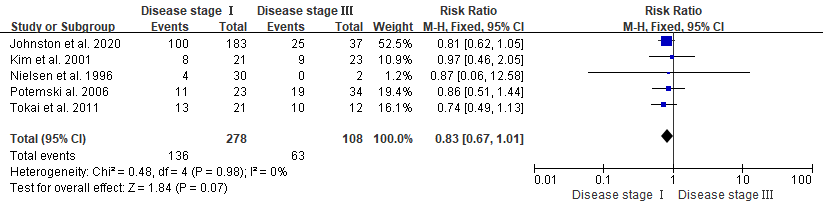


**3. ER status**


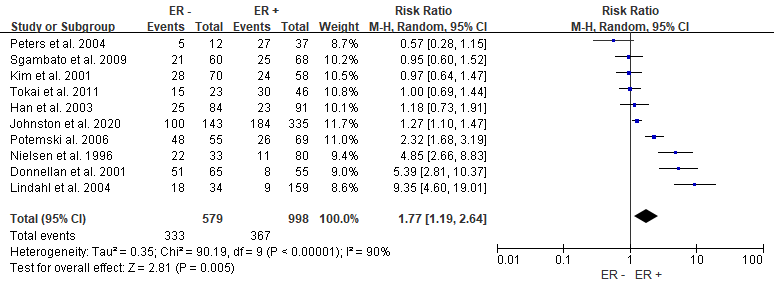


**4. PR status**


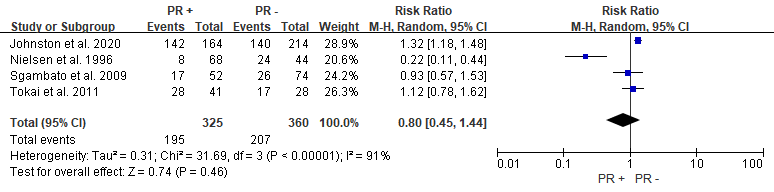


**5. Menopausal status**


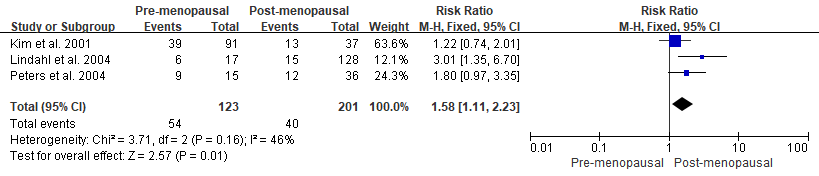


**6. Histologic Grade**


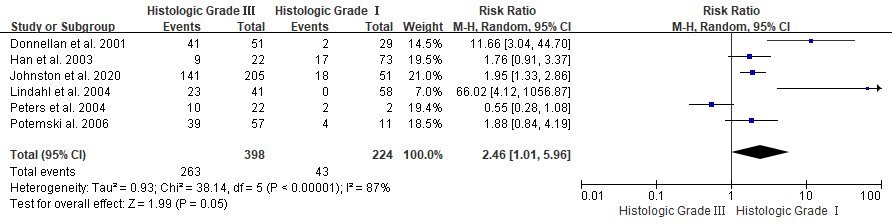


**7. Histological type**


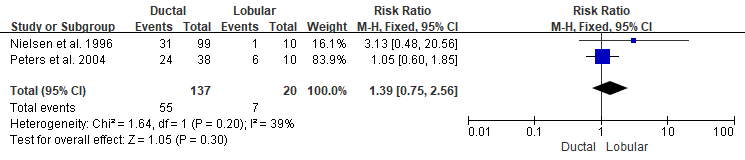


**8. Lymph node status**


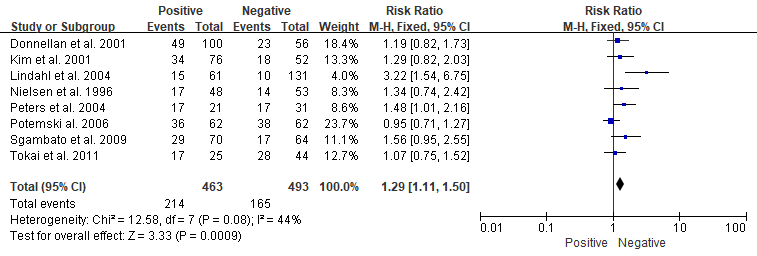


**9. tumor size**


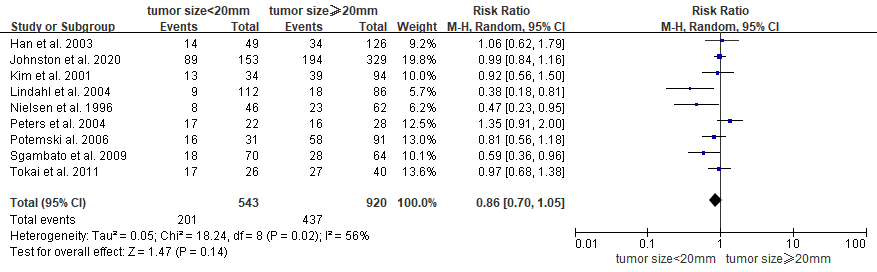


**10.HER-2**


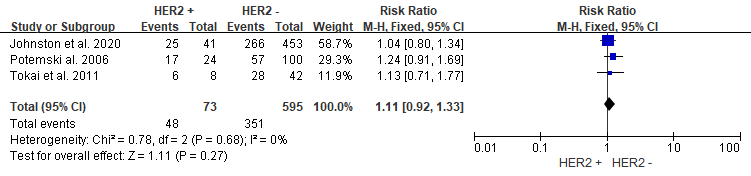


**11.nuclear grade**


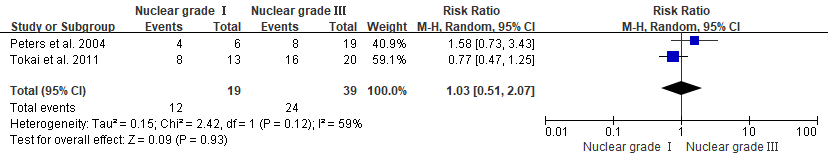

Supplement: Supplementary file 6 [file 80aea70e2f16cd7a041f91b9.docx]
