# Supplementary material for: Prognostic and Clinicopathological Value of Cyclin E Expression in Breast Cancer: A Meta-Analysis
Source: Research Square preprint supplement (doi:10.21203/rs.3.rs-210720/v1), 2021-02-22
Supplement: Supplementary file 5 [file 40bfbbda7f50d9ef2e83d663.docx]

Additional file 3. Quality assessment of the eligible studies.

| First author，year | Selection | | | | Comparability | Outcome | | | Score |
| --- | --- | --- | --- | --- | --- | --- | --- | --- | --- |
| Representativeness of the exposed cohort | Selection of the non exposed cohort | Ascertainment of exposure | The event was not present at the start of the study | Comparability of cohorts based on the design or analysis | Assessment of  outcome | Adequate follow-up time | Adequacy  of follow  up |
| Nielsen et al. 1996 [19] | ★ | ★ | ★ | ★ | ★ | ★ | ★ | ★ | 8 |
| Porter et al. 1997 [20] | ★ | ★ | ★ |  | ★ | ★ | ★ | ★ | 7 |
| Bukholm et al. 2001 [21] | ★ | ★ | ★ | ★ | ★ | ★ | ★ |  | 7 |
| Donnellan et al. 2001 [22] | ★ | ★ | ★ | ★ | ★ | ★ | ★ | ★ | 8 |
| Kim et al. 2001 [23] | ★ | ★ | ★ | ★ | ★ | ★ | ★ | ★ | 8 |
| Keyomarsi et al. 2002 [11] | ★ | ★ | ★ |  | ★★ | ★ | ★ |  | 7 |
| Han et al. 2003 [24] | ★ | ★ | ★ | ★ | ★ | ★ | ★ |  | 7 |
| Kühling, H et al. 2003 [25] | ★ | ★ | ★ | ★ | ★ | ★ | ★ | ★ | 8 |
| Rudolph et al. 2003 [26] | ★ | ★ | ★ | ★ | ★ | ★ |  | ★ | 7 |
| Span et al. 2003 [13] | ★ | ★ | ★ | ★ | ★ | ★ | ★ |  | 7 |
| Foulkes et al. 2004 [27] | ★ | ★ | ★ |  | ★★ | ★ | ★ |  | 7 |
| Lindahl et al. 2004 [28] | ★ | ★ | ★ |  | ★ | ★ | ★ | ★ | 7 |
| Peters et al. 2004 [29] | ★ | ★ | ★ |  | ★ | ★ | ★ | ★ | 7 |
| Arnes et al. 2005 [30] | ★ | ★ | ★ | ★ | ★ | ★ | ★ | ★ | 8 |
| Chappuis et al. 2005 [31] | ★ | ★ | ★ | ★ | ★★ | ★ | ★ |  | 8 |
| Brennan et al. 2006 [12] | ★ | ★ | ★ | ★ | ★ | ★ | ★ | ★ | 8 |
| Callagy et al. 2006 [32] | ★ | ★ | ★ |  | ★ | ★ | ★ | ★ | 7 |
| Desmedt et al. 2006 [33] | ★ | ★ | ★ |  | ★ | ★ | ★ | ★ | 7 |
| Porter et al. 2006 [14] | ★ | ★ | ★ | ★ | ★★ | ★ |  |  | 7 |
| Sieuwertset al. 2006 [34] | ★ | ★ | ★ | ★ | ★ | ★ | ★ | ★ | 8 |
| Somlo et al. 2008 [35] | ★ | ★ | ★ | ★ | ★ | ★ | ★ | ★ | 8 |
| Potemski et al. 2009 [36] | ★ | ★ | ★ | ★ | ★★ | ★ | ★ |  | 8 |
| Sgambato et al. 2009 [37] | ★ | ★ | ★ |  | ★ | ★ | ★ | ★ | 7 |
| Lemée et al. 2010 [38] | ★ | ★ | ★ | ★ | ★★ | ★ |  |  | 7 |
| Tokai et al. 2011 [39] | ★ | ★ | ★ | ★ | ★ | ★ | ★ |  | 7 |
| Voduc et al. 2008 [40] | ★ | ★ | ★ |  | ★★ | ★ | ★ | ★ | 8 |
| Lundgren et al. 2015 [41] | ★ | ★ | ★ |  | ★ | ★ | ★ | ★ | 7 |
| Johnston et al. 2020 [42] | ★ | ★ | ★ | ★ | ★★ | ★ | ★ |  | 8 |
