# Supplementary material for: Prognostic and Clinicopathological Value of Cyclin E Expression in Breast Cancer: A Meta-Analysis
Source: Research Square preprint supplement (doi:10.21203/rs.3.rs-210720/v1), 2021-02-22
Supplement: Supplementary file 8 [file 9a5c5316c8dec585f71fca14.docx]

**Additional file 1.** Searching strategy

**Embase**

| No. | Query | Results | Date |
| --- | --- | --- | --- |
| #4 | #1 AND #2 AND #3 | 275 | 2020/8/24 |
| #3 | 'prognosis':ab,ti OR 'survival':ab,ti OR 'prognostic':ab,ti OR 'outcome':ab,ti | 3,116,658 | 2020/8/24 |
| #2 | 'cyclin e':ab,ti | 5,874 | 2020/8/24 |
| #1 | 'breast neoplasms':ab,ti OR 'breast neoplasm':ab,ti OR 'neoplasm, breast':ab,ti OR 'breast tumors':ab,ti OR 'breast tumor':ab,ti OR 'tumor, breast':ab,ti OR 'tumors, breast':ab,ti OR 'neoplasms, breast':ab,ti OR 'breast cancer':ab,ti OR 'cancer, breast':ab,ti OR 'mammary cancer':ab,ti OR 'cancer, mammary':ab,ti OR 'cancers, mammary':ab,ti OR 'mammary cancers':ab,ti OR 'malignant neoplasm of breast':ab,ti OR 'breast malignant neoplasm':ab,ti OR 'breast malignant neoplasms':ab,ti OR 'malignant tumor of breast':ab,ti OR 'breast malignant tumor':ab,ti OR 'breast malignant tumors':ab,ti OR 'cancer of breast':ab,ti OR 'cancer of the breast':ab,ti OR 'mammary carcinoma, human':ab,ti OR 'carcinoma, human mammary':ab,ti OR 'carcinomas, human mammary':ab,ti OR 'human mammary carcinomas':ab,ti OR 'mammary carcinomas, human':ab,ti OR 'human mammary carcinoma':ab,ti OR 'mammary neoplasms, human':ab,ti OR 'human mammary neoplasm':ab,ti OR 'human mammary neoplasms':ab,ti OR 'neoplasm, human mammary':ab,ti OR 'neoplasms, human mammary':ab,ti OR 'mammary neoplasm, human':ab,ti OR 'breast carcinoma':ab,ti OR 'breast carcinomas':ab,ti OR 'carcinoma, breast':ab,ti OR 'carcinomas, breast':ab,ti | 430,019 | 2020/8/24 |

**Web of science**

| No. | Query | Results | Date |
| --- | --- | --- | --- |
| #10 | #9 AND #6 AND #3 | 670 | 2020/8/24 |
| #9 | #8 OR #7 | 5,461,312 | 2020/8/24 |
| #8 | TI=(Prognosis OR survival OR Prognostic OR outcome) | 1,144,613 | 2020/8/24 |
| #7 | AB=(Prognosis OR survival OR Prognostic OR outcome) | 5,091,336 | 2020/8/24 |
| #6 | #5 OR #4 | 16,943 | 2020/8/24 |
| #5 | TI=cyclin E | 2,269 | 2020/8/24 |
| #4 | AB=cyclin E | 16,339 | 2020/8/24 |
| #3 | #2 OR #1 | 827,139 | 2020/8/24 |
| #2 | TI=(Breast Neoplasms OR Breast Neoplasm OR Neoplasm, Breast OR Breast Tumors OR Breast Tumor OR Tumor, Breast OR Tumors, Breast OR Neoplasms, Breast OR Breast Cancer OR Cancer, Breast OR Mammary Cancer OR Cancer, Mammary OR Cancers, Mammary OR Mammary Cancers OR Malignant Neoplasm of Breast OR Breast Malignant Neoplasm OR Breast Malignant Neoplasms OR Malignant Tumor of Breast OR Breast Malignant Tumor OR Breast Malignant Tumors OR Cancer of Breast OR Cancer of the Breast OR Mammary Carcinoma, Human OR Carcinoma, Human Mammary OR Carcinomas, Human Mammary OR Human Mammary Carcinomas OR Mammary Carcinomas, Human OR Human Mammary Carcinoma OR Mammary Neoplasms, Human OR Human Mammary Neoplasm OR Human Mammary Neoplasms OR Neoplasm, Human Mammary OR Neoplasms, Human Mammary OR Mammary Neoplasm, Human OR Breast Carcinoma OR Breast Carcinomas OR Carcinoma, Breast) | 419,909 | 2020/8/24 |
| #1 | AB=(Breast Neoplasms OR Breast Neoplasm OR Neoplasm, Breast OR Breast Tumors OR Breast Tumor OR Tumor, Breast OR Tumors, Breast OR Neoplasms, Breast OR Breast Cancer OR Cancer, Breast OR Mammary Cancer OR Cancer, Mammary OR Cancers, Mammary OR Mammary Cancers OR Malignant Neoplasm of Breast OR Breast Malignant Neoplasm OR Breast Malignant Neoplasms OR Malignant Tumor of Breast OR Breast Malignant Tumor OR Breast Malignant Tumors OR Cancer of Breast OR Cancer of the Breast OR Mammary Carcinoma, Human OR Carcinoma, Human Mammary OR Carcinomas, Human Mammary OR Human Mammary Carcinomas OR Mammary Carcinomas, Human OR Human Mammary Carcinoma OR Mammary Neoplasms, Human OR Human Mammary Neoplasm OR Human Mammary Neoplasms OR Neoplasm, Human Mammary OR Neoplasms, Human Mammary OR Mammary Neoplasm, Human OR Breast Carcinoma OR Breast Carcinomas OR Carcinoma, Breast) | 746,270 | 2020/8/24 |

**Cochrane library**

| ID. | Search | Hits | Date Run |
| --- | --- | --- | --- |
| #1 | Breast Neoplasms | 14,712 | 2020/8/24 |
| #2 | (Breast Neoplasm):ti,ab,kw OR (Neoplasm, Breast):ti,ab,kw OR (Breast Tumors):ti,ab,kw OR (Breast Tumor):ti,ab,kw OR (Tumor, Breast):ti,ab,kw OR (Tumors, Breast):ti,ab,kw OR (Neoplasms, Breast):ti,ab,kw OR (Breast Cancer):ti,ab,kw OR (Cancer, Breast):ti,ab,kw OR (Mammary Cancer):ti,ab,kw OR (Cancer, Mammary):ti,ab,kw OR (Cancers, Mammary):ti,ab,kw OR (Mammary Cancers):ti,ab,kw OR (Malignant Neoplasm of Breast):ti,ab,kw OR (Breast Malignant Neoplasm):ti,ab,kw OR (Breast Malignant Neoplasms):ti,ab,kw OR (Malignant Tumor of Breast):ti,ab,kw OR (Breast Malignant Tumor):ti,ab,kw OR (Breast Malignant Tumors):ti,ab,kw OR (Cancer of Breast):ti,ab,kw OR (Cancer of the Breast):ti,ab,kw OR (Mammary Carcinoma, Human):ti,ab,kw OR (Carcinoma, Human Mammary):ti,ab,kw OR (Carcinomas, Human Mammary):ti,ab,kw OR (Human Mammary Carcinomas):ti,ab,kw OR (Mammary Carcinomas, Human):ti,ab,kw OR (Human Mammary Carcinoma):ti,ab,kw OR (Mammary Neoplasms, Human):ti,ab,kw OR (Human Mammary Neoplasm):ti,ab,kw OR (Human Mammary Neoplasms):ti,ab,kw OR (Neoplasm, Human Mammary):ti,ab,kw OR (Neoplasms, Human Mammary):ti,ab,kw OR (Mammary Neoplasm, Human):ti,ab,kw OR (Breast Carcinoma):ti,ab,kw OR (Breast Carcinomas):ti,ab,kw OR (Carcinoma, Breast):ti,ab,kw OR (Carcinomas, Breast):ti,ab,kw | 37,230 | 2020/8/24 |
| #3 | #1or#2 | 37,453 | 2020/8/24 |
| #4 | cyclin E | 253 | 2020/8/24 |
| #5 | (prognosis):ti,ab,kw OR (prognostic):ti,ab,kw OR (survival):ti,ab,kw OR (outcome):ti,ab,kw | 547,882 | 2020/8/24 |
| #6 | #3 and #4 and #5 | 94 | 2020/8/24 |

**Pubmed**

| Search number | Query | Search Details | Results | Time |
| --- | --- | --- | --- | --- |
| 4 | (((((prognosis[Title/Abstract]) OR (prognostic[Title/Abstract])) OR (survival[Title/Abstract])) OR (outcome[Title/Abstract])) AND (cyclin E[Title/Abstract])) AND ((((((((((((((((((((((((((((((((((((((Breast Neoplasms[Title/Abstract]) OR (Breast Neoplasm[Title/Abstract])) OR (Neoplasm, Breast[Title/Abstract])) OR (Breast Tumors[Title/Abstract])) OR (Breast Tumor[Title/Abstract])) OR (Tumor, Breast[Title/Abstract])) OR (Tumors, Breast[Title/Abstract])) OR (Neoplasms, Breast[Title/Abstract])) OR (Breast Cancer[Title/Abstract])) OR (Cancer, Breast[Title/Abstract])) OR (Mammary Cancer[Title/Abstract])) OR (Cancer, Mammary[Title/Abstract])) OR (Cancers, Mammary[Title/Abstract])) OR (Mammary Cancers[Title/Abstract])) OR (Malignant Neoplasm of Breast[Title/Abstract])) OR (Breast Malignant Neoplasm[Title/Abstract])) OR (Breast Malignant Neoplasms[Title/Abstract])) OR (Malignant Tumor of Breast[Title/Abstract])) OR (Breast Malignant Tumor[Title/Abstract])) OR (Breast Malignant Tumors[Title/Abstract])) OR (Cancer of Breast[Title/Abstract])) OR (Cancer of the Breast[Title/Abstract])) OR (Mammary Carcinoma, Human[Title/Abstract])) OR (Carcinoma, Human Mammary[Title/Abstract])) OR (Carcinomas, Human Mammary[Title/Abstract])) OR (Human Mammary Carcinomas[Title/Abstract])) OR (Mammary Carcinomas, Human[Title/Abstract])) OR (Human Mammary Carcinoma[Title/Abstract])) OR (Mammary Neoplasms, Human[Title/Abstract])) OR (Human Mammary Neoplasm[Title/Abstract])) OR (Human Mammary Neoplasms[Title/Abstract])) OR (Neoplasm, Human Mammary[Title/Abstract])) OR (Neoplasms, Human Mammary[Title/Abstract])) OR (Mammary Neoplasm, Human[Title/Abstract])) OR (Breast Carcinoma[Title/Abstract])) OR (Breast Carcinomas[Title/Abstract])) OR (Carcinoma, Breast[Title/Abstract])) OR (Carcinomas, Breast[Title/Abstract])) | (((("prognosis"[Title/Abstract] OR "prognostic"[Title/Abstract]) OR "survival"[Title/Abstract]) OR "outcome"[Title/Abstract]) AND "cyclin e"[Title/Abstract]) AND ((((((((((((((((((((((((((((((((((((("breast neoplasms"[Title/Abstract] OR "breast neoplasm"[Title/Abstract]) OR "neoplasm breast"[Title/Abstract]) OR "breast tumors"[Title/Abstract]) OR "breast tumor"[Title/Abstract]) OR "tumor breast"[Title/Abstract]) OR "tumors breast"[Title/Abstract]) OR "neoplasms breast"[Title/Abstract]) OR "breast cancer"[Title/Abstract]) OR "cancer breast"[Title/Abstract]) OR "mammary cancer"[Title/Abstract]) OR "cancer mammary"[Title/Abstract]) OR "cancers mammary"[Title/Abstract]) OR "mammary cancers"[Title/Abstract]) OR "malignant neoplasm of breast"[Title/Abstract]) OR "breast malignant neoplasm"[Title/Abstract]) OR "breast malignant neoplasms"[Title/Abstract]) OR "malignant tumor of breast"[Title/Abstract]) OR "breast malignant tumor"[Title/Abstract]) OR "breast malignant tumors"[Title/Abstract]) OR "cancer of breast"[Title/Abstract]) OR "cancer of the breast"[Title/Abstract]) OR "mammary carcinoma human"[Title/Abstract]) OR (((("Carcinoma"[MeSH Terms] OR "Carcinoma"[All Fields]) OR "Carcinomas"[All Fields]) OR "carcinoma s"[All Fields]) AND "human mammary"[Title/Abstract])) OR (((("Carcinoma"[MeSH Terms] OR "Carcinoma"[All Fields]) OR "Carcinomas"[All Fields]) OR "carcinoma s"[All Fields]) AND "human mammary"[Title/Abstract])) OR "human mammary carcinomas"[Title/Abstract]) OR ((((((("mammaries"[All Fields] OR "mammary glands, human"[MeSH Terms]) OR (("Mammary"[All Fields] AND "glands"[All Fields]) AND "Human"[All Fields])) OR "human mammary glands"[All Fields]) OR "Mammary"[All Fields]) OR "Breast"[MeSH Terms]) OR "Breast"[All Fields]) AND "carcinomas human"[Title/Abstract])) OR "human mammary carcinoma"[Title/Abstract]) OR ((((((("mammaries"[All Fields] OR "mammary glands, human"[MeSH Terms]) OR (("Mammary"[All Fields] AND "glands"[All Fields]) AND "Human"[All Fields])) OR "human mammary glands"[All Fields]) OR "Mammary"[All Fields]) OR "Breast"[MeSH Terms]) OR "Breast"[All Fields]) AND "neoplasms human"[Title/Abstract])) OR (((((((((((((((((("human s"[All Fields] OR "humane"[All Fields]) OR "humanely"[All Fields]) OR "humaneness"[All Fields]) OR "humanism"[MeSH Terms]) OR "humanism"[All Fields]) OR "humanities"[MeSH Terms]) OR "humanities"[All Fields]) OR "humanity"[All Fields]) OR "humanity s"[All Fields]) OR "humanization"[All Fields]) OR "humanize"[All Fields]) OR "humanizes"[All Fields]) OR "humanizing"[All Fields]) OR "humanness"[All Fields]) OR "humans"[MeSH Terms]) OR "humans"[All Fields]) OR "Human"[All Fields]) AND "mammary neoplasm"[Title/Abstract])) OR "human mammary neoplasms"[Title/Abstract]) OR (((("neoplasm s"[All Fields] OR "Neoplasms"[MeSH Terms]) OR "Neoplasms"[All Fields]) OR "Neoplasm"[All Fields]) AND "human mammary"[Title/Abstract])) OR (((("neoplasm s"[All Fields] OR "Neoplasms"[MeSH Terms]) OR "Neoplasms"[All Fields]) OR "Neoplasm"[All Fields]) AND "human mammary"[Title/Abstract])) OR ((((((("mammaries"[All Fields] OR "mammary glands, human"[MeSH Terms]) OR (("Mammary"[All Fields] AND "glands"[All Fields]) AND "Human"[All Fields])) OR "human mammary glands"[All Fields]) OR "Mammary"[All Fields]) OR "Breast"[MeSH Terms]) OR "Breast"[All Fields]) AND "neoplasm human"[Title/Abstract])) OR "breast carcinoma"[Title/Abstract]) OR "breast carcinomas"[Title/Abstract]) OR "carcinoma breast"[Title/Abstract]) OR "carcinomas breast"[Title/Abstract]) | 205 | 10:37:06 |
| 3 | (((prognosis[Title/Abstract]) OR (prognostic[Title/Abstract])) OR (survival[Title/Abstract])) OR (outcome[Title/Abstract]) | "prognosis"[Title/Abstract] OR "prognostic"[Title/Abstract] OR "survival"[Title/Abstract] OR "outcome"[Title/Abstract] | 2,159,368 | 10:36:45 |
| 2 | cyclin E[Title/Abstract] | "cyclin e"[Title/Abstract] | 4,989 | 10:35:52 |
| 1 | (((((((((((((((((((((((((((((((((((((Breast Neoplasms[Title/Abstract]) OR (Breast Neoplasm[Title/Abstract])) OR (Neoplasm, Breast[Title/Abstract])) OR (Breast Tumors[Title/Abstract])) OR (Breast Tumor[Title/Abstract])) OR (Tumor, Breast[Title/Abstract])) OR (Tumors, Breast[Title/Abstract])) OR (Neoplasms, Breast[Title/Abstract])) OR (Breast Cancer[Title/Abstract])) OR (Cancer, Breast[Title/Abstract])) OR (Mammary Cancer[Title/Abstract])) OR (Cancer, Mammary[Title/Abstract])) OR (Cancers, Mammary[Title/Abstract])) OR (Mammary Cancers[Title/Abstract])) OR (Malignant Neoplasm of Breast[Title/Abstract])) OR (Breast Malignant Neoplasm[Title/Abstract])) OR (Breast Malignant Neoplasms[Title/Abstract])) OR (Malignant Tumor of Breast[Title/Abstract])) OR (Breast Malignant Tumor[Title/Abstract])) OR (Breast Malignant Tumors[Title/Abstract])) OR (Cancer of Breast[Title/Abstract])) OR (Cancer of the Breast[Title/Abstract])) OR (Mammary Carcinoma, Human[Title/Abstract])) OR (Carcinoma, Human Mammary[Title/Abstract])) OR (Carcinomas, Human Mammary[Title/Abstract])) OR (Human Mammary Carcinomas[Title/Abstract])) OR (Mammary Carcinomas, Human[Title/Abstract])) OR (Human Mammary Carcinoma[Title/Abstract])) OR (Mammary Neoplasms, Human[Title/Abstract])) OR (Human Mammary Neoplasm[Title/Abstract])) OR (Human Mammary Neoplasms[Title/Abstract])) OR (Neoplasm, Human Mammary[Title/Abstract])) OR (Neoplasms, Human Mammary[Title/Abstract])) OR (Mammary Neoplasm, Human[Title/Abstract])) OR (Breast Carcinoma[Title/Abstract])) OR (Breast Carcinomas[Title/Abstract])) OR (Carcinoma, Breast[Title/Abstract])) OR (Carcinomas, Breast[Title/Abstract]) | (((((((((((((((((((((((((((((((((((("breast neoplasms"[Title/Abstract] OR "breast neoplasm"[Title/Abstract]) OR "neoplasm breast"[Title/Abstract]) OR "breast tumors"[Title/Abstract]) OR "breast tumor"[Title/Abstract]) OR "tumor breast"[Title/Abstract]) OR "tumors breast"[Title/Abstract]) OR "neoplasms breast"[Title/Abstract]) OR "breast cancer"[Title/Abstract]) OR "cancer breast"[Title/Abstract]) OR "mammary cancer"[Title/Abstract]) OR "cancer mammary"[Title/Abstract]) OR "cancers mammary"[Title/Abstract]) OR "mammary cancers"[Title/Abstract]) OR "malignant neoplasm of breast"[Title/Abstract]) OR "breast malignant neoplasm"[Title/Abstract]) OR "breast malignant neoplasms"[Title/Abstract]) OR "malignant tumor of breast"[Title/Abstract]) OR "breast malignant tumor"[Title/Abstract]) OR "breast malignant tumors"[Title/Abstract]) OR "cancer of breast"[Title/Abstract]) OR "cancer of the breast"[Title/Abstract]) OR "mammary carcinoma human"[Title/Abstract]) OR (((("Carcinoma"[MeSH Terms] OR "Carcinoma"[All Fields]) OR "Carcinomas"[All Fields]) OR "carcinoma s"[All Fields]) AND "human mammary"[Title/Abstract])) OR (((("Carcinoma"[MeSH Terms] OR "Carcinoma"[All Fields]) OR "Carcinomas"[All Fields]) OR "carcinoma s"[All Fields]) AND "human mammary"[Title/Abstract])) OR "human mammary carcinomas"[Title/Abstract]) OR ((((((("mammaries"[All Fields] OR "mammary glands, human"[MeSH Terms]) OR (("Mammary"[All Fields] AND "glands"[All Fields]) AND "Human"[All Fields])) OR "human mammary glands"[All Fields]) OR "Mammary"[All Fields]) OR "Breast"[MeSH Terms]) OR "Breast"[All Fields]) AND "carcinomas human"[Title/Abstract])) OR "human mammary carcinoma"[Title/Abstract]) OR ((((((("mammaries"[All Fields] OR "mammary glands, human"[MeSH Terms]) OR (("Mammary"[All Fields] AND "glands"[All Fields]) AND "Human"[All Fields])) OR "human mammary glands"[All Fields]) OR "Mammary"[All Fields]) OR "Breast"[MeSH Terms]) OR "Breast"[All Fields]) AND "neoplasms human"[Title/Abstract])) OR (((((((((((((((((("human s"[All Fields] OR "humane"[All Fields]) OR "humanely"[All Fields]) OR "humaneness"[All Fields]) OR "humanism"[MeSH Terms]) OR "humanism"[All Fields]) OR "humanities"[MeSH Terms]) OR "humanities"[All Fields]) OR "humanity"[All Fields]) OR "humanity s"[All Fields]) OR "humanization"[All Fields]) OR "humanize"[All Fields]) OR "humanizes"[All Fields]) OR "humanizing"[All Fields]) OR "humanness"[All Fields]) OR "humans"[MeSH Terms]) OR "humans"[All Fields]) OR "Human"[All Fields]) AND "mammary neoplasm"[Title/Abstract])) OR "human mammary neoplasms"[Title/Abstract]) OR (((("neoplasm s"[All Fields] OR "Neoplasms"[MeSH Terms]) OR "Neoplasms"[All Fields]) OR "Neoplasm"[All Fields]) AND "human mammary"[Title/Abstract])) OR (((("neoplasm s"[All Fields] OR "Neoplasms"[MeSH Terms]) OR "Neoplasms"[All Fields]) OR "Neoplasm"[All Fields]) AND "human mammary"[Title/Abstract])) OR ((((((("mammaries"[All Fields] OR "mammary glands, human"[MeSH Terms]) OR (("Mammary"[All Fields] AND "glands"[All Fields]) AND "Human"[All Fields])) OR "human mammary glands"[All Fields]) OR "Mammary"[All Fields]) OR "Breast"[MeSH Terms]) OR "Breast"[All Fields]) AND "neoplasm human"[Title/Abstract])) OR "breast carcinoma"[Title/Abstract]) OR "breast carcinomas"[Title/Abstract]) OR "carcinoma breast"[Title/Abstract]) OR "carcinomas breast"[Title/Abstract] | 307,493 | 10:35:26 |
